# Supplementary material for: Sirtuin Inhibitors Are Broadly Antiviral against Arboviruses
Source: PubMed Central journal article supplement (PMC6747726; doi:10.1128/mbio.01446-19), 2019-07-09

**A**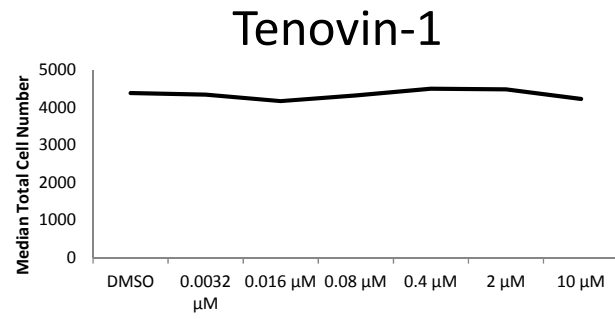**B**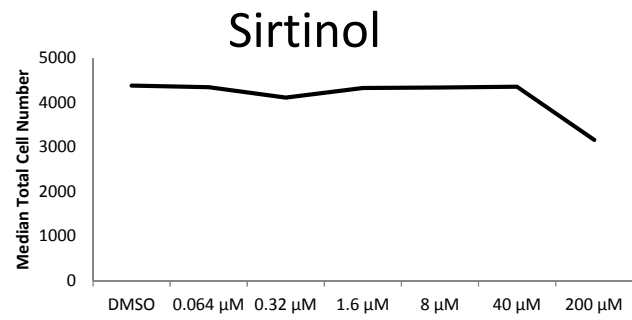**C**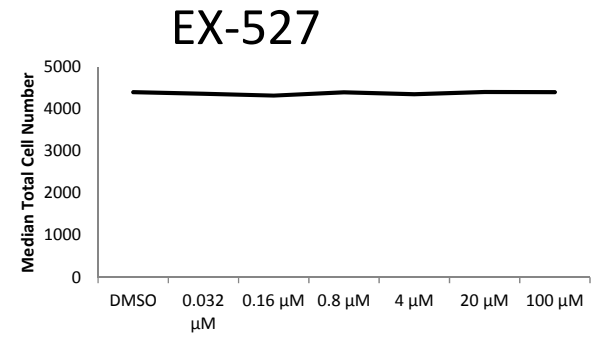**D**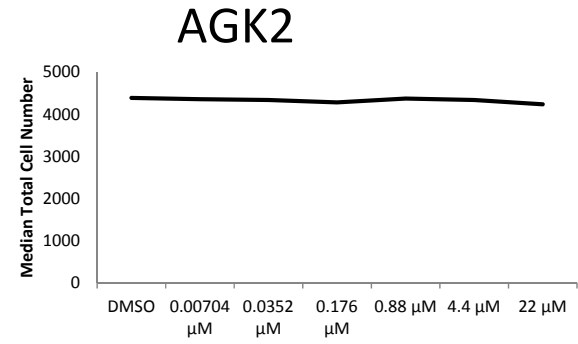

Supplement: mBio.01446-19-sf001.pdf [file mBio.01446-19-sf001.pdf]
