# Supplementary material for: Sirtuin Inhibitors Are Broadly Antiviral against Arboviruses
Source: PubMed Central journal article supplement (PMC6747726; doi:10.1128/mbio.01446-19), 2019-07-09
Supplement: mBio.01446-19-st001.pdf [file mBio.01446-19-st001.pdf]

Table S1: Primers used for RT-qPCR

| <b>Target</b> | <b>Forward Primer</b>    | <b>Reverse Primer</b>     |
|---------------|--------------------------|---------------------------|
| WNV           | CCTGTGTGAGCTGACAAACTTAGT | GCGTTTTAGCATATTGACAGCC    |
| RVFV          | CAAGCAGTGGACCGCAATGAGA   | GGGCTTGTTGCCACGAGTTAGA    |
| LACV          | GCTGAGTCTAATGGTGTAGGATG  | TGGTCAGCGGGTAGAATTTG      |
| CHIKV         | GGCAGTGGTCCCAGATAATTCAAG | ACTGTCTAGATCCACCCCATACATG |
| IAV           | TTAGGATTTGTGTTACGCTCACCG | CCAGCCATTTGCTCCATAGCCTTG  |
| YFV           | TGGCATATTCCAGTCAACCTTCT  | GAAGCCCAAGATGGAATCAACT    |
| DENV2         | TGAGGACTACATGGGCTCTG     | AAACCTCCCTGGATTCCTT       |
| ZIKV          | GTGTCATACTGTGGGCCTTG     | AATATTCCAGGCAGGGTCTG      |
| GAPDH         | ACCAAATCCGTTGACTCCGACCTT | TCGACAGTCAGCCGCATCTTCTTT  |
